# Supplementary material
Source: publisher site journal article supplement (https://www.dovepress.com/article/277435)
Supplement: Supplementary file 1 [file get_supplementary_file.php]

**Depression is Associated with Moderate-Intensity Physical Activity among College Students during the COVID-19 Pandemic：Differs by Activity level, Sex and Gender-Role**

**(Supplementary)**

Jingyuan Lin 1,*, Tianyou Guo 2,*, Benjamin Becker 3, Qian Yu 2, Sitong Chen 4, Stubbs Brendon 5, Md Mahabub Hossain 6, Paolo Marcello Cunha 7, Fernanda Cunha Soares 8, Nicola Veronese 9, Jane Jie Yu 10, Igor Grabovac 11, Lee Smith 12, Albert Yeung 13, Liye Zou 2, Hong Li 1

1Research Centre of Brain Function and Psychological Science; Center for Language and Brain, Shenzhen Institute of Neuroscience; Shenzhen Key Laboratory of Affective and Social Cognitive Science, Shenzhen University, Shenzhen 518060, China

2 Exercise and Mental Health Laboratory, School of Psychology, Shenzhen University, Shenzhen 518060, China

3 The Clinical Hospital of Chengdu Brain Science Institute, MOE Key Laboratory for Neuroinformation, University of Electronic Science and Technology of China, Chengdu 610054, Sichuan, China

4 Institute for Health and Sport, Victoria University, Melbourne 3000, VIC, Australia

5 Department of Psychological Medicine, Institute of Psychiatry, Psychology, and Neuroscience, King’s College London, London, UK

6 Department of Health Promotion and Community Health Sciences, School of Public Health, Texas A&M University, TX77843, USA

7 Metabolism, Nutrition, and Exercise Laboratory, Londrina State University, Londrina, Paraná, 86010-580, Brazil

8 Superior School of Physical Education, University of Pernambuco, Recife, PE, Brazil

9 Geriatric Unit, Department of Internal Medicine and Geriatrics, University of Palermo,
90100 Palermo, Italy

10 Department of Sports Science and Physical Education, The Chinese University of Hong Kong, Shatin, New Territories, 999077, Hong Kong

11 Department of Social and Preventive Medicine, Center for Public Health, Medical University of Vienna, Kinderspitalgasse 15/1, 109, Austria

12 The Cambridge Centre for Sport and Exercise Sciences, Anglia Ruskin University, Cambridge, CB1 1PT, UK

13 Depression Clinical and Research Program, Massachusetts General Hospital, Boston, MA 02114, USA

**Correspondence:** Hong Li

School of Psychology, Shenzhen University, Shenzhen 518060, China

Tel +86 139 0297 3932

Email [lihongwrm@vip.sina.com](mailto:lihongwrm@vip.sina.com)

*These authors contributed equally to this work

**Appendix 1 Data Processing Rules of IPAQ-SF**

(Retrieved from “Guidelines for the data processing and analysis of the International Physical Activity Questionnaire”, see [www.ipaq.ki.se](http://www.ipaq.ki.se) for detail)

**Data Cleaning**

I. Any responses to duration (time) provided in the hours and minutes response option should be converted from hours and minutes into minutes.

II. To ensure that responses in ‘minutes’ were not entered in the ‘hours’ column by mistake during self-completion or during data entry process, values of ‘15’, ‘30’, ‘45’, ‘60’ and ‘90’ in the ‘hours’ column should be converted to ‘15’, ‘30’, ‘45’, ‘60’ and ‘90’ minutes, respectively, in the minutes column.

III. In some cases duration (time) will be reported as weekly (not daily) e.g., VWHRS, VWMINS. These data should be converted into an average daily time by dividing by 7.

IV. If ‘don’t know’ or ‘refused ‘or data are missing for time or days then that case is removed from analysis.

**Note**: Both the number of days *and* daily time are required for the creation of categorical and continuous summary variables

**Maximum Values for Excluding Outliers**

This rule is to exclude data which are unreasonably high; these data are to be considered outliers and thus are excluded from analysis. All cases in which the sum total of all Walking, Moderate and Vigorous time variables is greater than 960 minutes (16 hours) should be excluded from the analysis. This assumes that on average an individual of 8 hours per day is spent sleeping.

The ‘days’ variables can take the range 0-7 days, or 8, 9 (don’t know or refused); values greater than 9 should not be allowed and those cases excluded from analysis.

**Minimum Values for Duration of Activity**

Only values of 10 or more minutes of activity should be included in the calculation of summary scores. The rationale being that the scientific evidence indicates that episodes or bouts of at least 10 minutes are required to achieve health benefits.

Responses of less than 10 minutes [and their associated days] should be re-coded to ‘zero’.

**Truncation of Data Rules**

This rule attempts to normalize the distribution of levels of activity which are usually skewed in national or large population data sets.

In IPAQ short - it is recommended that all Walking, Moderate and Vigorous time variables exceeding ‘3 hours’ or ‘180 minutes’ are truncated (that is re-coded) to be equal to ‘180 minutes’ in a new variable. This rule permits a maximum of 21 hours of activity in a week to be reported for each category (3 hours * 7 days).

In IPAQ long – the truncation process is more complicated, but to be consistent with the approach for IPAQ short requires that the variables total Walking, total Moderate-intensity and total Vigorous-intensity activity are calculated and then, for each of these summed behaviours, the total value should be truncated to 3 hours (180 minutes).

When analysing the data as categorical variable or presenting median and interquartile ranges of the MET-minute scores, the application of the truncation rule will not affect the results. This rule does have the important effect of preventing misclassification in the ‘high’ category. For example, an individual who reports walking for 10 minutes on 6 days and 12 hours of moderate activity on one day could be coded as ‘high’ because this pattern meets the ‘7 day” and “3000 MET-min” criteria for ‘high’. However, this uncommon pattern of activity is unlikely to yield the health benefits that the ‘high’ category is intended to represent.

Although using median is recommended due to the skewed distribution of scores, if IPAQ data are analysed and presented as a continuous variable using mean values, the application of the truncation rule will produce slightly lower mean values than would otherwise be obtained.

**Calculating MET-minute/week Scores**

Data processing rules 7.2, 7.3, and 7.4 deals first with excluding outlier data, then secondly, with recoding minimum values and then finally dealing with high values.

These rules will ensure that highly active people remain classified as ‘high’, while decreasing the chances that less active individuals are misclassified and coded as ‘high’.

Using the resulting variables, convert time and days to MET-minute/week scores.

**Calculating Total Days for Presenting Categorical Data on Moderate and High Levels**

Presenting IPAQ data using categorical variables requires the total number of ‘days’ on which all physical activity was undertaken to be assessed. This is difficult because frequency in ‘days’ is asked separately for walking, moderate-intensity and vigorous-intensity PA, thus allowing the total number of ‘days’ to range from a minimum of 0 to a maximum of 21’days’ per week in IPAQ short and higher in IPAQ long. The IPAQ instrument does not record if different types of activity are undertaken on the same day.

In calculating ‘moderately active’, the primary requirement is to identify those individuals who undertake activity on at least ‘5 days’/week. Individuals who meet this criterion should be coded in a new variable called “*at* *least five days”* and this variable should be used to identify those meeting criterion b) at least 30 minutes of moderate-intensity activity and/or walking; and those meeting criterion c) any combination of walking, moderate-intensity or vigorous-intensity PA achieving a minimum of 600 MET-minutes/week.

Below are two examples showing this coding in practice:

i) an individual who reports ‘2 days of moderate-intensity’ and ‘3 days of walking’

should be coded as a value indicating “*at least five days”*;

ii) an individual reporting ‘2 days of vigorous-intensity’, ‘2 days of moderate-intensity’ and ‘2 days of walking should be coded as a value to indicate “*at* *least five days”* [even though the actual total is 6].

The original frequency of ‘days’ for each type of activity should remain in the data file for use in the other calculations.

The same approach as described above is used to calculate total days for computing the ‘high’ category. The primary requirement according to the stated criteria is to identify those individuals who undertake a combination of walking, moderate-intensity and or vigorous-intensity activity on at least 7 days/week.

Individuals who meet this criterion should be coded as a value in a new variable to reflect *“at least 7 days*”.

Below are two examples showing this coding in practice:

i) an individual who reports ‘4 days of moderate-intensity’ and ‘3 days of walking’

should be coded as the new variable *“at least 7 days”*.

ii) an individual reporting ‘3 days of vigorous-intensity’, ‘3 days moderate-intensity’ and ‘3 days walking’ should be coded as *“at least 7 days*” [even though the total adds to 9].

**Appendix 2 Cut Point Values for Categorical Variable of IPAQ-SF**

| **Category** | **Criteria for classification** |
| --- | --- |
| **High** | a) vigorous-intensity activity on at least 3 days achieving a minimum Total physical activity of at least 1500 MET-minutes/week. **OR** b) 7 or more days of any combination of walking, moderate-intensity or vigorous-intensity PA achieving a minimum Total physical activity of at least 3000 MET-minutes/week. |
| **Moderate** | a) 3 or more days of vigorous-intensity activity of at least 20 minutes per day. **OR** b) 5 or more days of moderate-intensity activity and/or walking of at least 30 minutes per day. **OR** c) 5 or more days of any combination of walking, moderate-intensity or vigorous-intensity PA achieving a minimum Total physical activity of at least 600 MET-minutes/week. |
| **Low** | Participants who not meet criteria for high or moderate activity level categories are considered to have a low physical activity level. |

Note: Data from Guidelines for the data processing and analysis of the International Physical Activity Questionnaire”, see https://sites.google.com/site/theipaq/scoring-protocol for detail.
